# Supplementary material for: E3 Ubiquitin Ligase TRIP12: Regulation, Structure, and Physiopathological Functions
Source: PubMed Central journal article supplement (PMC7697007; doi:10.3390/ijms21228515), 2020-11-12
Supplement: ijms-21-08515-s001.pdf [file ijms-21-08515-s001.pdf]

**Supplemental Table.** The Thyroid hormone Receptor Interacting Proteins family and their functional roles are presented except for TRIP12, which is the topic of this review.

|       | Uniprot Human | Alternative Short Name                                                                                        | Alternative Name                                                                                                                                                                                                                                                                                                                                                                                  | Function                                                                                                                                                                                                                                                                                                                                                                                                                                                                                                                           |
|-------|---------------|---------------------------------------------------------------------------------------------------------------|---------------------------------------------------------------------------------------------------------------------------------------------------------------------------------------------------------------------------------------------------------------------------------------------------------------------------------------------------------------------------------------------------|------------------------------------------------------------------------------------------------------------------------------------------------------------------------------------------------------------------------------------------------------------------------------------------------------------------------------------------------------------------------------------------------------------------------------------------------------------------------------------------------------------------------------------|
| TRIP1 | P62195        | PRS8<br>P45/SUG1                                                                                              | 26S proteasome regulatory subunit 8, 26S proteasome AAA-ATPase subunit RPT6, Proteasome 26S subunit ATPase 5. Proteasome subunit p45                                                                                                                                                                                                                                                              | Transcriptional activator [1–4]<br>p45 ATPase subunit of PA700, the regulatory complex of the 26S proteasome [5,6].                                                                                                                                                                                                                                                                                                                                                                                                                |
| TRIP2 | Q15648        | MED1<br><br>TRAP220<br><br>DRIP205<br><br>ARC205<br><br>CRSP200<br><br>PBP, PPAR-binding protein<br><br>RB18A | Mediator of RNA polymerase II transcription subunit 1<br><br>Thyroid hormone receptor-associated protein complex 220 kDa component<br><br>Vitamin D receptor-interacting protein complex component<br><br>Activator-recruited cofactor 205 kDa component<br><br>Cofactor Required for Sp1<br><br>Peroxisome proliferator-activated receptor-binding protein<br><br>Recognized by PAb1801 antibody | Component of the Mediator complex, a coactivator involved in the regulated transcription of nearly all RNA polymerase II-dependent genes [7].<br><br>Interaction with nuclear receptors in a ligand-dependent manner, global activator for the nuclear receptor superfamily [8–10].<br><br>Subunit p200 of the transcriptional factor CRSP is identical to TRIP2 [11].<br><br>Interaction with peroxisome proliferator-activated receptor [12].<br><br>Identification of common antigenic and functional properties with P53 [13]. |
| TRIP3 | Q15649        | ZNHIT3<br><br>HNF-4a coactivator                                                                              | ZNHIT3 Zinc finger HIT domain-containing protein 3<br><br>Hepatocyte Nuclear Factor 4a coactivator                                                                                                                                                                                                                                                                                                | The heterodimer NUFIP1 (nuclear fragile X mental retardation-interacting protein 1)-ZNHIT3 is implicated in the assembly of the box C/D small nucleolar ribonucleoprotein (snoRNP) [14] and in starvation-induced ribophagy [15].<br><br>[16]                                                                                                                                                                                                                                                                                      |
| TRIP4 | Q15650        | ASC-1                                                                                                         | Activating signal cointegrator 1                                                                                                                                                                                                                                                                                                                                                                  | Transcription coactivator that associates with nuclear receptors, transcriptional coactivators and basal transcription factors [17].<br>Component of the human RQC-trigger (hRQT) complex that facilitates ribosome-associated quality control [18].                                                                                                                                                                                                                                                                               |
| TRIP5 | P52732        | KIF11<br>HKSP<br>Eg5                                                                                          | Kinesin-like protein KIF11<br>Kinesin-like spindle protein                                                                                                                                                                                                                                                                                                                                        | Motor protein required for establishing a bipolar spindle during mitosis [19,20]. Required in non-mitotic cells for transport of secretory proteins from the Golgi complex to the cell surface [21].<br>Modulates neuronal migration [21,22].                                                                                                                                                                                                                                                                                      |
| TRIP6 | Q15654        | ZRP-1<br>OIP-1                                                                                                | Zyxin-related protein 1<br>Opa-interacting protein 1                                                                                                                                                                                                                                                                                                                                              | Relays signals from the cell surface to the nucleus to weaken adherent junction and promote actin cytoskeleton reorganization and                                                                                                                                                                                                                                                                                                                                                                                                  |

|        |        |                                 |                                                                                                                                      |                                                                                                                                                                                                                                                                  |
|--------|--------|---------------------------------|--------------------------------------------------------------------------------------------------------------------------------------|------------------------------------------------------------------------------------------------------------------------------------------------------------------------------------------------------------------------------------------------------------------|
|        |        |                                 |                                                                                                                                      | cell invasiveness, transcriptional coactivator for NF-kappa-B and JUN [23].                                                                                                                                                                                      |
| TRIP7  | Q15651 | HMGN3                           | High mobility group nucleosome-binding domain-containing protein 3                                                                   | Binds to nucleosomes, regulating chromatin structure [24,25].                                                                                                                                                                                                    |
| TRIP8  | Q15652 | JMJD1C                          | Probable JmjC domain-containing histone demethylation protein 2C                                                                     | Probable histone demethylase that specifically demethylates Lysine 9 residue of histone H3 [26].                                                                                                                                                                 |
| TRIP9  | Q15653 | NF-Kappa-BIB                    | NF-kappa-B inhibitor beta                                                                                                            | Inhibits NF-kappa-B by complexing with and trapping it in the cytoplasm [27].                                                                                                                                                                                    |
| TRIP10 | Q15642 | CIP4<br>STP                     | Cdc42-interacting protein 4<br>Salt tolerant protein Protein Felic                                                                   | Required for translocation of GLUT4 to the plasma membrane [28]. Required for membrane tubulation during endocytosis, the formation of podosomes. Promotes membrane invagination and the formation of tubules. Promotes CDC42-induced actin polymerization [29]. |
| TRIP11 | Q15643 | GMAP-210<br>CEV14               | Golgi-associated microtubule-binding protein 210<br>Clonal evolution-related gene on chromosome 14 protein                           | Is a membrane tether required for vesicle tethering to Golgi, essential role in the maintenance of Golgi structure and function [30].                                                                                                                            |
| TRIP12 | Q14669 |                                 |                                                                                                                                      |                                                                                                                                                                                                                                                                  |
| TRIP13 | Q15645 | PCH2<br>16E1-BP                 | Pachytene checkpoint protein 2 homolog<br>Human papillomavirus type 16 E1 protein-binding protein                                    | Plays a key role in chromosome recombination and chromosome structure development during meiosis [31]. Promotes early steps of the DNA double-strand breaks (DSBs) repair process [32].<br>Plays a role in mitotic spindle assembly checkpoint activation [33].  |
| TRIP14 | Q15646 | OASL<br>2'-5'-OAS-RP<br>p59OASL | 2'-5'-oligoadenylate synthase-like protein<br>2'-5'-OAS-related protein p59OASL 59 kDa<br>2'-5'-oligoadenylate synthase-like protein | Can bind double-stranded RNA. Displays antiviral activity against encephalomyocarditis and hepatitis C virus [34].                                                                                                                                               |
| TRIP15 | P61201 | SGN2                            | COP9 signalosome complex subunit 2<br>Alien homolog<br>JAB1-containing<br>signalosome subunit 2                                      | Essential component of the COP9 signalosome complex (CSN) [35].                                                                                                                                                                                                  |

## References

- Baur, E.V.; Zechel, C.; Heery, D.; Heine, M.J.; Garnier, J.M.; Vivat, V.; Le Douarin, B.; Gronemeyer, H.; Chambon, P.; Losson, R. Differential ligand-dependent interactions between the AF-2 activating domain of nuclear receptors and the putative transcriptional intermediary factors mSUG1 and TIF1. *EMBO J.* **1996**, *15*, 110–124, doi:10.1002/j.1460-2075.1996.tb00339.x.
- Swaffield, J.C.; Melcher, K.; Johnston, S.A. A highly conserved ATPase protein as a mediator between acidic activation domains and the TATA-binding protein. *Nat. Cell Biol.* **1995**, *374*, 88–91, doi:10.1038/374088a0.
- Lee, J.W.; Ryan, F.; Swaffield, J.C.; Johnston, S.A.; Moore, D.D. Interaction of thyroid-hormone receptor with a conserved transcriptional mediator. *Nat. Cell Biol.* **1995**, *374*, 91–94, doi:10.1038/374091a0.
- Ingle, E.; Chappell, D.; Poon, S.Y.K.; Sarna, M.K.; Beaumont, J.G.; Williams, J.H.; Stillitano, J.P.; Tsai, S.; Leedman, P.J.; Tilbrook, P.A.; et al. Thyroid Hormone Receptor-interacting Protein 1 Modulates Cytokine and

- Nuclear Hormone Signaling in Erythroid Cells. *J. Biol. Chem.* **2001**, *276*, 43428–43434, doi:10.1074/jbc.m106645200.
5. Su, K.; Yang, X.; Roos, M.D.; Paterson, A.J.; Kudlow, J.E. Human Sug1/p45 is involved in the proteasome-dependent degradation of Sp1. *Biochem. J.* **2000**, *348*, 281–289.
  6. Yamada, H.Y.; Gorbsky, G.J. Inhibition of TRIP1/S8/hSug1, a component of the human 19S proteasome, enhances mitotic apoptosis induced by spindle poisons. *Mol. Cancer Ther.* **2006**, *5*, 29–38, doi:10.1158/1535-7163.mct-05-0126.
  7. Fondell, J.D.; Brunel, F.; Hisatake, K.; Roeder, R.G. Unliganded thyroid hormone receptor alpha can target TATA-binding protein for transcriptional repression. *Mol. Cell. Biol.* **1996**, *16*, 281–287, doi:10.1128/mcb.16.1.281.
  8. Kang, Y.K.; Guermah, M.; Yuan, C.-X.; Roeder, R.G. The TRAP/Mediator coactivator complex interacts directly with estrogen receptors alpha and beta through the TRAP220 subunit and directly enhances estrogen receptor function in vitro. *Proc. Natl. Acad. Sci. USA* **2002**, *99*, 2642–2647.
  9. Rachez, C.; Lemon, B.D.; Suldan, Z.; Bromleigh, V.; Gamble, M.J.; Näär, A.M.; Erdjument-Bromage, H.; Tempst, P.; Freedman, L.P. Ligand-dependent transcription activation by nuclear receptors requires the DRIP complex. *Nat. Cell Biol.* **1999**, *398*, 824–828, doi:10.1038/19783.
  10. Yuan, C.-X.; Ito, M.; Fondell, J.D.; Fu, Z.-Y.; Roeder, R.G. The TRAP220 component of a thyroid hormone receptor-associated protein (TRAP) coactivator complex interacts directly with nuclear receptors in a ligand-dependent fashion. *Proc. Natl. Acad. Sci. USA* **1998**, *95*, 7939–7944, doi:10.1073/pnas.95.14.7939.
  11. Ryu, S.; Zhou, S.; Ladurner, A.G.; Tjian, R. The transcriptional cofactor complex CRSP is required for activity of the enhancer-binding protein Sp1. *Nat. Cell Biol.* **1999**, *397*, 446–450, doi:10.1038/17141.
  12. Zhu, Y.; Qi, C.; Jain, S.; Rao, M.S.; Reddy, J.K. Isolation and Characterization of PBP, a Protein That Interacts with Peroxisome Proliferator-activated Receptor. *J. Biol. Chem.* **1997**, *272*, 25500–25506, doi:10.1074/jbc.272.41.25500.
  13. Drané, P.; Barel, M.; Balbo, M.; Frade, R. Identification of RB18A, a 205 kDa new p53 regulatory protein which shares antigenic and functional properties with p53. *Oncogene* **1997**, *15*, 3013–3024, doi:10.1038/sj.onc.1201492.
  14. Quinternet, M.; Rothé, B.; Barbier, M.; Bobo, C.; Saliou, J.-M.; Jacquemin, C.; Back, R.; Chagot, M.-E.; Cianferani, S.; Meyer, P.; et al. Structure/Function Analysis of Protein–Protein Interactions Developed by the Yeast Pih1 Platform Protein and Its Partners in Box C/D snoRNP Assembly. *J. Mol. Biol.* **2015**, *427*, 2816–2839, doi:10.1016/j.jmb.2015.07.012.
  15. Wyant, G.A.; Abu-Remaileh, M.; Frenkel, E.M.; Laqtom, N.N.; Dharamdasani, V.; Lewis, C.A.; Chan, S.H.; Heinze, I.; Ori, A.; Sabatini, D.M. NUFIP1 is a ribosome receptor for starvation-induced ribophagy. *Sci.* **2018**, *360*, 751–758, doi:10.1126/science.aar2663.
  16. Iwahashi, H.; Yamagata, K.; Yoshiuchi, I.; Terasaki, J.; Yang, Q.; Fukui, K.; Ihara, A.; Zhu, Q.; Asakura, T.; Cao, Y.; et al. Thyroid Hormone Receptor Interacting Protein 3 (Trip3) Is a Novel Coactivator of Hepatocyte Nuclear Factor-4. *Diabetes* **2002**, *51*, 910–914, doi:10.2337/diabetes.51.4.910.
  17. Kim, H.-J.; Yi, J.-Y.; Sung, H.-S.; Moore, D.D.; Jhun, B.H.; Lee, Y.C.; Lee, J.W. Activating Signal Cointegrator 1, a Novel Transcription Coactivator of Nuclear Receptors, and Its Cytosolic Localization under Conditions of Serum Deprivation. *Mol. Cell. Biol.* **1999**, *19*, 6323–6332, doi:10.1128/mcb.19.9.6323.
  18. Hashimoto, S.; Sugiyama, T.; Yamazaki, R.; Nobuta, R.; Inada, T. Identification of a novel trigger complex that facilitates ribosome-associated quality control in mammalian cells. *Sci. Rep.* **2020**, *10*, 3422, doi:10.1038/s41598-020-60241-w.
  19. Sawin, K.E.; Mitchison, T.J. Mutations in the kinesin-like protein Eg5 disrupting localization to the mitotic spindle. *Proc. Natl. Acad. Sci. USA* **1995**, *92*, 4289–4293, doi:10.1073/pnas.92.10.4289.
  20. Hata, S.; Peidro, A.P.; Panic, M.; Liu, P.; Atorino, E.; Funaya, C.; Jäkke, U.; Pereira, G.; Schiebel, E. The balance between KIFC3 and EG5 tetrameric kinesins controls the onset of mitotic spindle assembly. *Nat. Cell Biol.* **2019**, *21*, 1138–1151, doi:10.1038/s41556-019-0382-6.
  21. Wakana, Y.; Villeneuve, J.; van Galen, J.; Cruz-Garcia, D.; Tagaya, M.; Malhotra, V. Kinesin-5/Eg5 is important for transport of CARTS from the trans-Golgi network to the cell surface. *J. Cell Biol.* **2013**, *202*, 241–250.
  22. Falnikar, A.; Tole, S.; Baas, P.W. Kinesin-5, a mitotic microtubule-associated motor protein, modulates neuronal migration. *Mol. Biol. Cell* **2011**, *22*, 1561–1574, doi:10.1091/mbc.e10-11-0905.
  23. Willier, S.; Butt, E.; Richter, G.H.; Burdach, S.; Grunewald, T.G.P. Defining the role of TRIP6 in cell physiology and cancer. *Biol. Cell* **2011**, *103*, 573–591, doi:10.1042/bc20110077.

24. West, K.L.; Ito, Y.; Birger, Y.; Postnikov, Y.; Shirakawa, H.; Bustin, M. HMGN3a and HMGN3b, Two Protein Isoforms with a Tissue-specific Expression Pattern, Expand the Cellular Repertoire of Nucleosome-binding Proteins. *J. Biol. Chem.* **2001**, *276*, 25959–25969, doi:10.1074/jbc.m101692200.
25. Barkess, G.; Postnikov, Y.; Campos, C.D.; Mishra, S.; Mohan, G.; Verma, S.; Bustin, M.; West, K. The chromatin-binding protein HMGN3 stimulates histone acetylation and transcription across the Glyt1 gene. *Biochem. J.* **2012**, *442*, 495–505, doi:10.1042/bj20111502.
26. Katoh, M.; Katoh, M. Comparative integromics on JMJD1C gene encoding histone demethylase: Conserved POU5F1 binding site elucidating mechanism of JMJD1C expression in undifferentiated ES cells and diffuse-type gastric cancer. *Int. J. Oncol.* **2007**, *31*, 219–223.
27. Baldwin, A.S. The NF-kappa B and I kappa B proteins: New discoveries and insights. *Annu. Rev. Immunol.* **1996**, *14*, 649–683.
28. Hartig, S.M.; Ishikura, S.; Hicklen, R.S.; Feng, Y.; Blanchard, E.G.; Voelker, K.A.; Pichot, C.S.; Grange, R.W.; Raphael, R.M.; Klip, A.; et al. The F-BAR protein CIP4 promotes GLUT4 endocytosis through bidirectional interactions with N-WASp and Dynamin-2. *J. Cell Sci.* **2009**, *122*, 2283–2291, doi:10.1242/jcs.041343.
29. Itoh, T.; Erdmann, K.S.; Roux, A.; Habermann, B.; Werner, H.; De Camilli, P. Dynamin and the Actin Cytoskeleton Cooperatively Regulate Plasma Membrane Invagination by BAR and F-BAR Proteins. *Dev. Cell* **2005**, *9*, 791–804, doi:10.1016/j.devcel.2005.11.005.
30. Zucchetti, A.E.; Bataille, L.; Carpier, J.-M.; Dogniaux, S.; Roman-Jouve, M.S.; Maurin, M.; Stuck, M.W.; Rios, R.M.; Baldari, C.T.; Pazour, G.J.; et al. Tethering of vesicles to the Golgi by GMAP210 controls LAT delivery to the immune synapse. *Nat. Commun.* **2019**, *10*, 1–17, doi:10.1038/s41467-019-10891-w.
31. Roig, I.; Dowdle, J.A.; Toth, A.; de Rooij, D.G.; Jasin, M.; Keeney, S. Mouse TRIP13/PCH2 is required for recombination and normal higher-order chromosome structure during meiosis. *PLoS Genet.* **2010**, *6*, e1001062.
32. Clairmont, C.S.; Sarangi, P.; Ponninselvan, K.; Galli, L.D.; Csete, I.; Moreau, L.; Adelmant, G.; Chowdhury, D.; Marto, J.A.; D'Andrea, A.D. TRIP13 regulates DNA repair pathway choice through REV7 conformational change. *Nat. Cell Biol.* **2020**, *22*, 87–96, doi:10.1038/s41556-019-0442-y.
33. Défachelles, L.; Russo, A.E.; Nelson, C.R.; Bhalla, N. The conserved AAA-ATPase PCH-2 TRIP13 regulates spindle checkpoint strength. *Mol. Biol. Cell* **2020**, *31*, 2219–2233, doi:10.1091/mbc.e20-05-0310.
34. Ishibashi, M.; Wakita, T.; Esumi, M. 2',5'-Oligoadenylate synthetase-like gene highly induced by hepatitis C virus infection in human liver is inhibitory to viral replication in vitro. *Biochem. Biophys. Res. Commun.* **2010**, *392*, 397–402, doi:10.1016/j.bbrc.2010.01.034.
35. Schaefer, L.; Beermann, M.L.; Miller, J.B. Coding Sequence, Genomic Organization, Chromosomal Localization, and Expression Pattern of the Signalosome Component Cops2: The Mouse Homologue of Drosophila Alien. *Genomics* **1999**, *56*, 310–316, doi:10.1006/geno.1998.5728.
